# Supplementary material for: Iron aggravates hepatic insulin resistance in the absence of inflammation in a novel db/db mouse model with iron overload
Source: PubMed Central journal article supplement — Mol Metab. 2021 Apr 16;51:101235. doi: 10.1016/j.molmet.2021.101235 (PMC8131719; doi:10.1016/j.molmet.2021.101235), 2021-04-16
Supplement: mmc1.pdf [file mmc1.pdf]

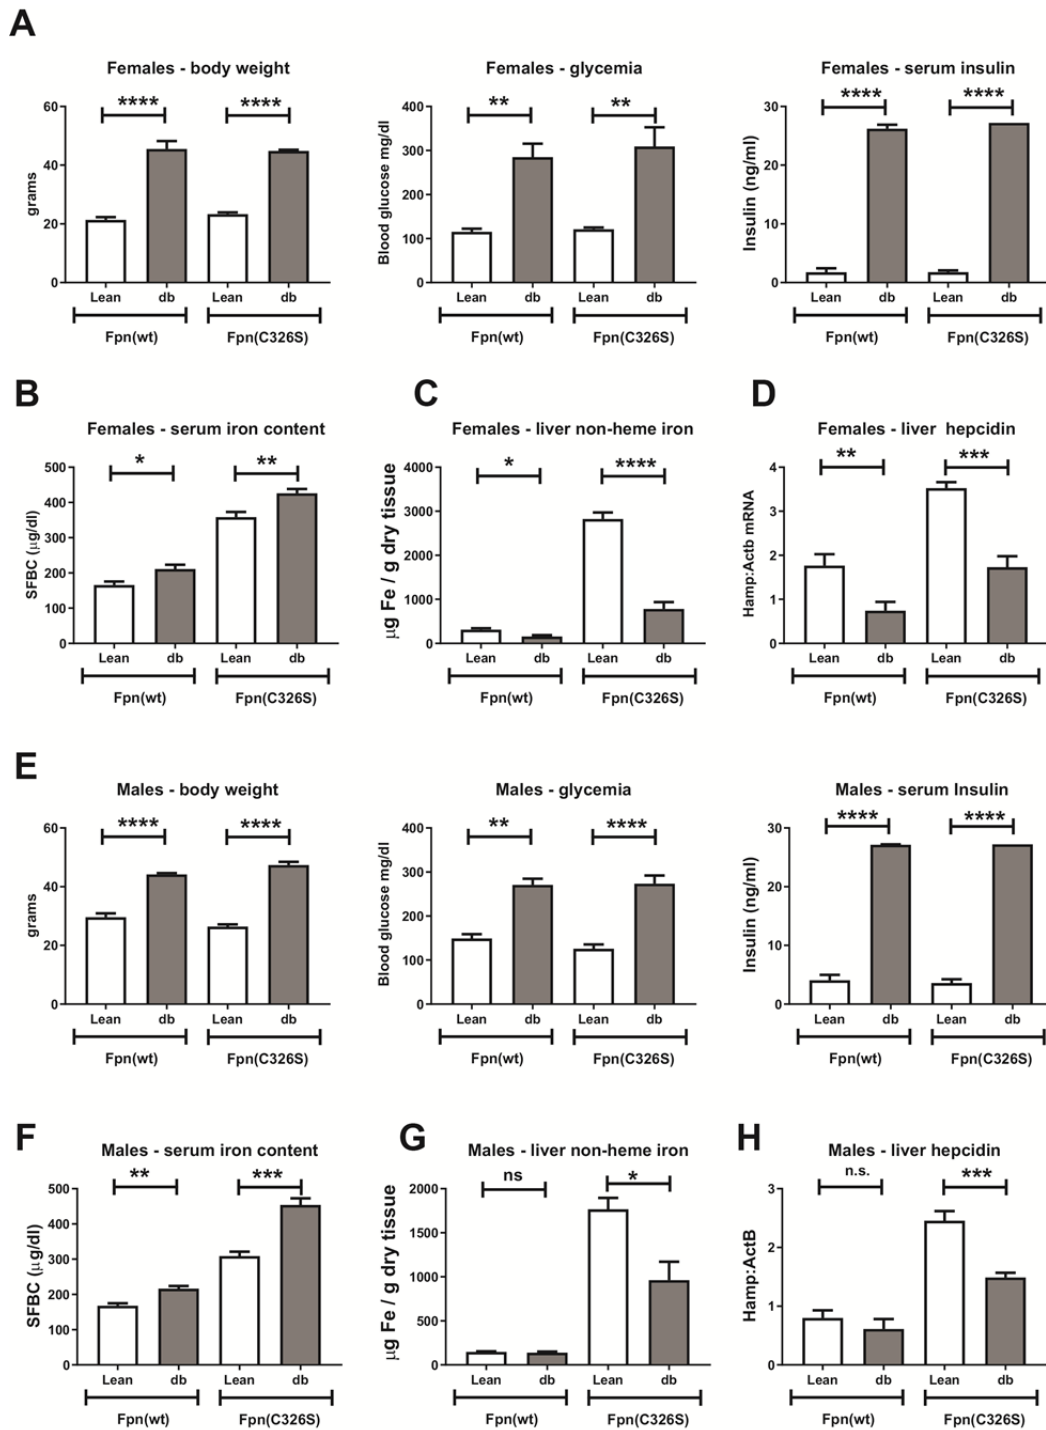

**Figure S1**

**Figure S1: Diabetic and iron parameters in young  $Lepr^{db/db}; Fpn^{wt/C326S}$  mice.** Biomarkers that hallmark type 2 diabetes and iron-related parameters were measured in 15-week-old animals with the gender and genotype indicated. (A,E) Body weight (in grams), blood glycemia (mg/dl) and serum insulin (ng/ml) were measured in 15-week old female (A) or male (E) mice. (B-D, F-H) Measurement of serum iron content ( $\mu\text{g/dl}$ ) (B,F), hepatic non-heme iron levels (C,G) and hepatic hepcidin mRNA expression in female and male mice, as indicated. Gene expression values were normalized to the housekeeping gene  $\beta$ -actin (ACTB). Data are reported as mean  $\pm$  SEM. Six or more mice per group were analyzed. Student's t-test p-value: \*  $p < 0.05$ ; \*\*  $p < 0.01$ ; \*\*\*  $p < 0.001$ ; \*\*\*\*  $p < 0.0001$ .

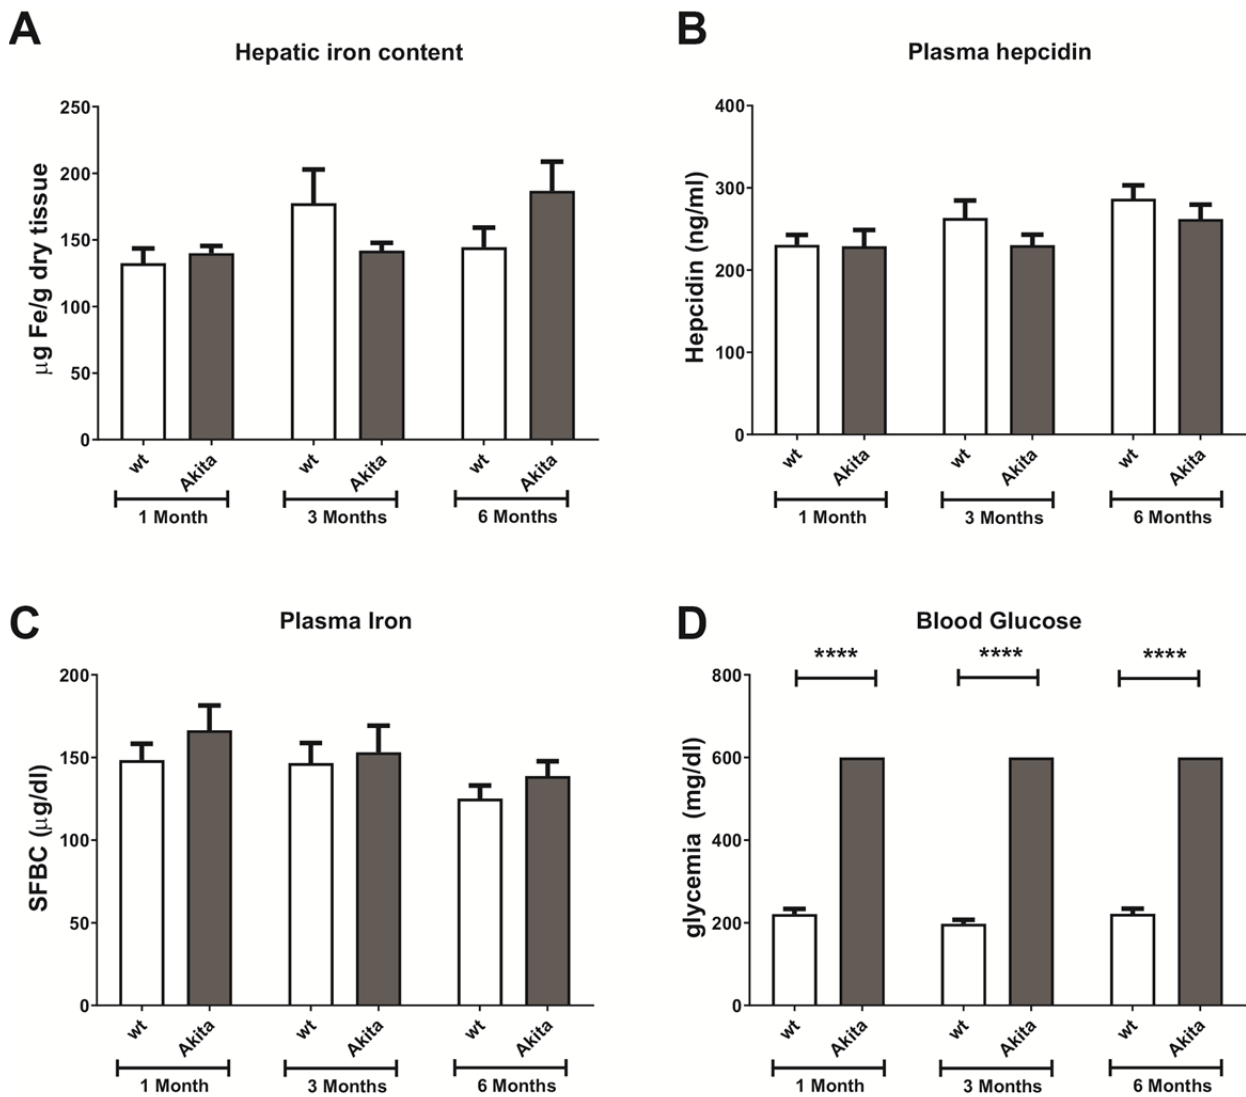

**Figure S2**

**Figure S2: Iron-related parameters remain unaltered in  $Ins2^{Akita}$  mice.** A-D)  $Ins2^{Akita}$  male mice and age and gender-matched controls have been analyzed at the times indicated for (A) hepatic non-heme iron content, (B) plasma hepcidin levels (ng/ml), (C) blood glucose (mg/dl) and (D) plasma iron content ( $\mu$ g/dl). Six or more mice per group were analyzed. Data are reported as mean  $\pm$  SEM. Student's t-test p-value: \*  $p < 0.05$ ; \*\*  $p < 0.01$ ; \*\*\*  $p < 0.001$ ; \*\*\*\*  $p < 0.0001$ .

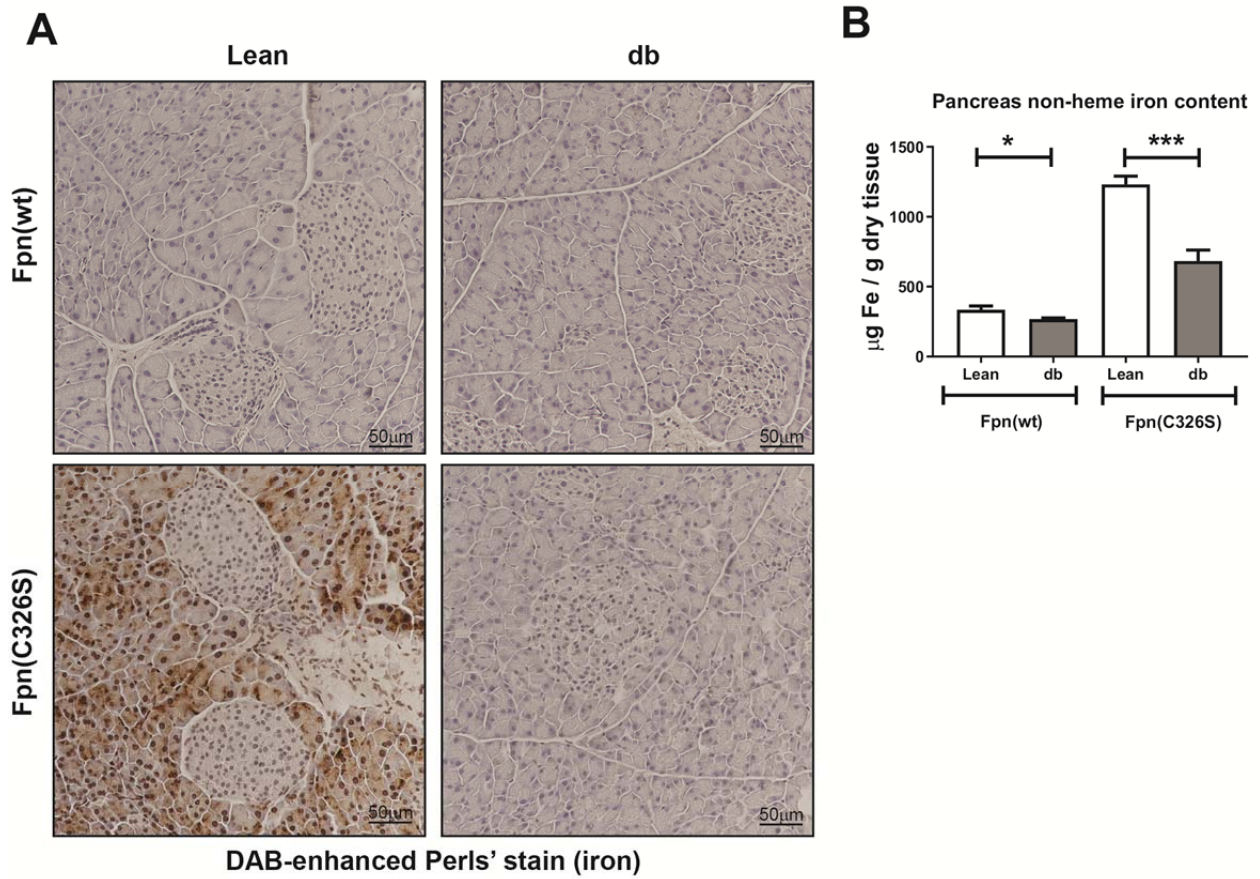

**Figure S3**

**Figure S3: Characterization of the pancreatic iron content and distribution.** A) DAB-enhanced Perls' iron staining of pancreata of female mice with the genotype indicated. B) Quantification of the pancreatic non-heme iron content normalized against dry tissue weight. Data are reported as mean  $\pm$  SEM. Six or more mice per group were analyzed. Student's t-test p-value: \*  $p < 0.05$ ; \*\*  $p < 0.01$ ; \*\*\*  $p < 0.001$ ; \*\*\*\*  $p < 0.0001$ .

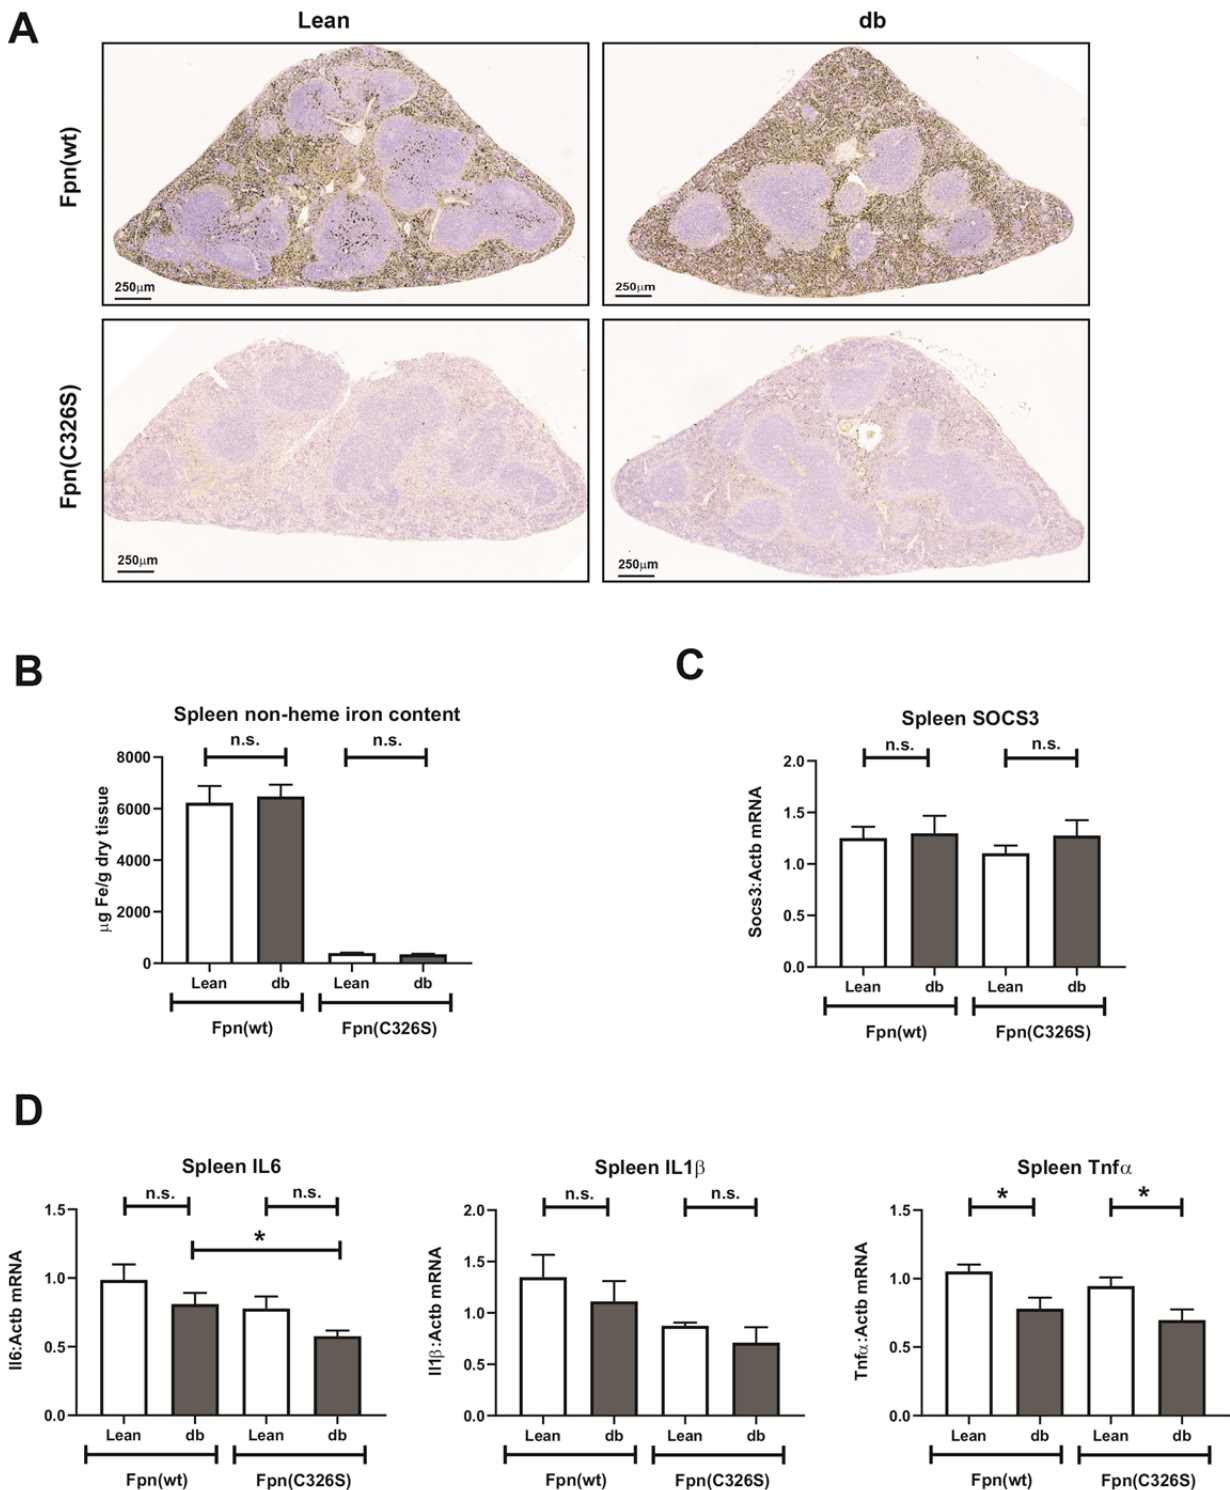

**Figure S4**

**Figure S4: Characterization of the splenic iron and inflammatory status.** A) DAB-enhanced Perls' iron staining of spleen of female mice with the genotype indicated. B) Quantification of the splenic non-heme iron content normalized against dry tissue weight. C-D) Gene expression analysis of the JAK/STAT3 target gene SOCS3 (D) and of the pro-inflammatory cytokines IL6 (D), IL1 $\beta$  (E) and TNF $\alpha$  (F). Gene expression values were normalized to the housekeeping gene  $\beta$ -actin (ACTB). Data are reported as mean  $\pm$  SEM. Six or more mice per group were analyzed. Student's t-test p-value: \* p<0.05; \*\* p<0.01; \*\*\* p<0.001; \*\*\*\* p<0.0001.

**Table S1.** SYBR green qPCR primers

| Gene           | Forward                      | Reverse                     | Gene         | Forward                     | Reverse                     |
|----------------|------------------------------|-----------------------------|--------------|-----------------------------|-----------------------------|
| <b>Hamp</b>    | ATACCAATGCAGAAGAGA<br>AGG    | AACAGATACCACACTGGG<br>AA    | <b>Pepck</b> | CCGTAGACCTGAAGGT<br>GT      | GGCAAAGGGGTCGTGCAT          |
| <b>TfR1</b>    | CCCATGACGTTGAATTGA<br>ACCT   | GTAGTCTCCACGAGCGGA<br>ATA   | <b>Fbp</b>   | GTTCCCTCCGGATGGT<br>TCA     | CAGCAGCCGCAGCTTTCC<br>A     |
| <b>Fpn</b>     | TGTCAGCCTGCTGTTTGC<br>AGGA   | TCTTGACAGCAACTGTGTC<br>ACCG | <b>Nqo1</b>  | AGCGTTCGGTATTACGA<br>TCC    | AGTACAATCAGGGCTCTTC<br>TCG  |
| <b>Bmp6</b>    | ATGGCAGGACTGGATCA<br>TTGC    | CCATCACAGTAGTTGGCA<br>GCG   | <b>Socs3</b> | CCTTTGACAAGCGGAC<br>TCTC    | GCCAGCATAAAAACCCCTTC<br>A   |
| <b>Id1</b>     | ACCCTGAACGGCGAGAT<br>CA      | TCGTCCGGCTGGAACACAT<br>G    | <b>Acc1</b>  | GCAGATCCGCAGCTTG<br>GT      | CGTGGAAGGGGAATCCAT          |
| <b>Smad6</b>   | GTTGCAACCCCTACCACT<br>TC     | GGAGGAGACAGCCGAGA<br>ATA    | <b>Lpin</b>  | GTCCAGTGTTTGACAGA<br>C      | GGGTTACAGTGAAGATC<br>CTAT   |
| <b>Atoh8</b>   | TCAGCTTCTCCGAGTGTG<br>TG     | TAGCCTGTGGCAGGTCAC<br>T     | <b>Fasn</b>  | CGTGTGGCCTACAC<br>CCAGAGCT  | GGCAGCAGGGCCTCCA<br>GCACCTT |
| <b>ACTB</b>    | GCTTCTTTGCAGCTCCT<br>TCGT    | ACCAGCGCAGCGATATC<br>G      | <b>Gpx4</b>  | CGCTCCATGCACGAA<br>TTCTC    | GCACACGAAACCCCTGT<br>ACT    |
| <b>Glut2</b>   | GTCGCCTCATTCTTTG<br>GTG      | CTGATACACTTCGTCCA<br>GC     | <b>Glut4</b> | GACGGACACTCCATCTGT<br>TG    | GCCACGATGGAGACATAGC         |
| <b>Srebp1c</b> | CGGAGCCATGGATTGGACA<br>TTTGA | GGAGAGTTGGCACCTGGGC<br>T    | <b>Scd1</b>  | GGTGATGTTCCAGAGGA<br>GGTACT | GGTGCTAACGAACAGGCT          |
| <b>Gpat</b>    | GCCTACAGCTCTGCTGCCA<br>T     | GTATGTGGCACTCTCAGCGT        | <b>Acl</b>   | GTGGACATGCTCAGGAA<br>CT     | CTGGTCAAGGTAGTGCCCA         |
| <b>Adipoq</b>  | GGAGAGAAAGGAGATGCA<br>GGT    | CTTTCCTGCCAGGGGTTTC         |              |                             |                             |

**Table S2:** Western blot antibodies and dilutions

| Antibody      | Dilution | Cat nr     | Company          |
|---------------|----------|------------|------------------|
| AKT           | 1:1000   | 9272S      | Cell signaling   |
| phospho-AKT   | 1:1000   | 4060s      | Cell signaling   |
| Fpn           | 1:500    | MTP1A      | Alphadiagnostics |
| IRS-1         | 1:2000   | 2382S      | Cell signaling   |
| Phospho-IRS-1 | 1:250    | 2381S      | Cell signaling   |
| Vinculin      | 1:1000   | SAB4503069 | Sigma Aldrich    |
